# Supplementary material for: Maternal Metabolic Demands Caused by Pregnancy and Lactation: Association with Productivity and Offspring Phenotype in High-Yielding Dairy Ewes
Source: Animals (Basel). 2019 May 30;9(6):295. doi: 10.3390/ani9060295 (PMC6617180; doi:10.3390/ani9060295)
Supplement: Supplementary file 1 [file animals-09-00295-s001.pdf]

**Table S1.** Estimates of Pearson correlation coefficients between lamb birth weight and maternal milk yield in mature ewes stratified by single *vs.* multiple pregnancies and by BCS score at different stages of pregnancy.

| Stage of pregnancy of mature ewes      |     |                             |                           |                          |                                  |
|----------------------------------------|-----|-----------------------------|---------------------------|--------------------------|----------------------------------|
| Lambs born to: ↓                       | n   | Month of conception (YDIMc) | Second month of pregnancy | Third month of pregnancy | Conception to drying off (YDIMd) |
| All mature ewes                        | 340 | 0.115 *                     | N/S                       | N/S                      | N/S                              |
| Single pregnancy                       | 83  | N/S                         | N/S                       | N/S                      | N/S                              |
| Multiple pregnancy                     | 257 | 0.198 ****                  | N/S                       | N/S                      | 0.128 *                          |
| <b>Maternal BCS at mid-pregnancy †</b> |     |                             |                           |                          |                                  |
| Thin (BCS ≤2)                          | 68  | N/S                         | N/S                       | N/S                      | N/S                              |
| Average (3 > BCS > 2)                  | 180 | N/S                         | N/S                       | N/S                      | N/S                              |
| Fat-BCS ≥3                             | 92  | 0.290 ***                   | 0.277 **                  | 0.313 ***                | 0.337 ****                       |
| <b>Maternal BCS at mid-pregnancy ‡</b> |     |                             |                           |                          |                                  |
| Thin (BCS ≤2)                          | 26  | N/S                         | N/S                       | N/S                      | N/S                              |
| Average (3 > BCS > 2)                  | 133 | 0.226 **                    | N/S                       | N/S                      | 0.175 *                          |
| Fat-BCS ≥3                             | 181 | N/S                         | N/S                       | N/S                      | N/S                              |

† 75 ± 5 d of pregnancy

‡ 142 ± 4 d of pregnancy

BCS, body condition score; YDIMc, Yield per day in milk during the month of conception; YDIMd, Yield per day in milk from conception to drying off; N/S, not significant.

\*\*\*\*  $p < 0.001$ ; \*\*\*  $p < 0.005$ ; \*\*  $p < 0.01$ ; \*  $p < 0.05$

**Table S2.** Estimates of Pearson correlation coefficients between lamb birth weight and maternal metabolite levels at mid-pregnancy (above) or late pregnancy (below) in mature ewes showing low, average, or high milk yield.

| Mid-pregnancy (75 ± 5d of pregnancy)   |     |                     |                    |         |                    |                     |                     |     |
|----------------------------------------|-----|---------------------|--------------------|---------|--------------------|---------------------|---------------------|-----|
| Maternal milk yield ↓                  | n   | GLU                 | LAC                | CHO     | TGL                | β-OHB               | NEFA                | UR  |
| L-TMY                                  | 80  | -0.192 <sup>†</sup> | N/S                | N/S     | N/S                | N/S                 | N/S                 | N/S |
| A-TMY                                  | 129 | 0.176 *             | N/S                | N/S     | N/S                | N/S                 | N/S                 | N/S |
| H-TMY                                  | 129 | N/S                 | 0.160 <sup>†</sup> | 0.182 * | -0.176 *           | N/S                 | N/S                 | N/S |
| L-YDIMd                                | 79  | N/S                 | 0.240 *            | N/S     | 0.245 *            | N/S                 | N/S                 | N/S |
| A-YDIMd                                | 136 | N/S                 | N/S                | N/S     | N/S                | N/S                 | N/S                 | N/S |
| H-YDIMd                                | 123 | N/S                 | N/S                | N/S     | N/S                | N/S                 | N/S                 | N/S |
| L-YDIMc                                | 89  | N/S                 | N/S                | N/S     | 0.202 <sup>†</sup> | N/S                 | N/S                 | N/S |
| A-YDIMc                                | 130 | N/S                 | N/S                | N/S     | N/S                | N/S                 | N/S                 | N/S |
| H-YDIMc                                | 119 | N/S                 | N/S                | N/S     | N/S                | N/S                 | 0.233 **            | N/S |
| Late-pregnancy (142 ± 4d of pregnancy) |     |                     |                    |         |                    |                     |                     |     |
| Maternal milk yield ↓                  | n   | GLU                 | LAC                | CHO     | TGL                | β-OHB               | NEFA                | UR  |
| L-TMY                                  | 80  | -0.292 **           | N/S                | N/S     | N/S                | N/S                 | N/S                 | N/S |
| A-TMY                                  | 129 | 0.215 **            | N/S                | N/S     | N/S                | -0.200 *            | -0.163 <sup>†</sup> | N/S |
| H-TMY                                  | 129 | N/S                 | N/S                | N/S     | N/S                | -0.250 **           | -0.214 *            | N/S |
| L-YDIMd                                | 79  | N/S                 | N/S                | N/S     | N/S                | -0.200 <sup>†</sup> | N/S                 | N/S |
| A-YDIMd                                | 136 | N/S                 | -0.191 *           | N/S     | N/S                | -0.146 <sup>†</sup> | -0.248 **           | N/S |
| H-YDIMd                                | 123 | N/S                 | N/S                | 0.173 * | N/S                | -0.299 ***          | N/S                 | N/S |
| L-YDIMc                                | 89  | 0.238 *             | N/S                | 0.220 * | N/S                | -0.248 *            | -0.181 <sup>†</sup> | N/S |
| A-YDIMc                                | 130 | N/S                 | N/S                | N/S     | N/S                | N/S                 | -0.187 *            | N/S |
| H-YDIMc                                | 119 | N/S                 | N/S                | N/S     | N/S                | N/S                 | N/S                 | N/S |

β-OHB, β-hydroxybutyrate; CHO, Cholesterol; GLU, Glucose; LAC, Lactate; NEFA, non-esterified fatty acids; TGL, Triglycerides; UR, Urea; TMY, Total milk yield; YDIMd, Yield per day in milk from conception to drying off; YDIMc, Yield per day in milk during the month of conception; N/S, not significant. \*\*\*  $p < 0.005$ ; \*\*  $p < 0.01$ ; \*  $p < 0.05$ ; <sup>†</sup>  $0.09 < p > 0.05$ .

**Table S3.** Estimates of Pearson correlation coefficients between milk yield during concurrent gestation and lactation and milk yield during the subsequent lactation in mature ewes with single or multiple pregnancies.

|                     |                 | n   | <i>r</i> |
|---------------------|-----------------|-----|----------|
| Pregnancy rank      |                 |     |          |
| Single              |                 | 86  | 0.662*   |
| Multiple            |                 | 132 | 0.604*   |
| Gender of offspring |                 |     |          |
| Single              | Male            | 40  | 0.705*   |
|                     | Female          | 46  | 0.599*   |
| Multiple            | Male + Female   | 75  | 0.581*   |
|                     | Female + Female | 36  | 0.596*   |
|                     | Male + Male     | 21  | 0.638*   |

\*  $p < 0.0001$

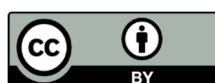

© 2019 by the authors. Submitted for possible open access publication under the terms and conditions of the Creative Commons Attribution (CC BY) license (<http://creativecommons.org/licenses/by/4.0/>).
